1 Lower Omega-3 Status Associated with Higher Erythrocyte Distribution Width and Neutrophil-  
2 Lymphocyte Ratio in UK Biobank Cohort

3 Michael I. McBurney<sup>1-3</sup>, Nathan L. Tintle<sup>1,4</sup>, William S. Harris<sup>1,5</sup>

4 <sup>1</sup>Fatty Acid Research Institute, Sioux Falls, SD 57106, USA (MIM, NLT, WSH); <sup>2</sup>Department of Human  
5 Health and Nutritional Sciences, University of Guelph, Guelph, ON N1G 2W1, Canada (MIM), <sup>3</sup>Division of  
6 Biochemical and Molecular Biology, Friedman School of Nutrition Science and Policy, Tufts University,  
7 Boston, MA 02111, USA (MIM); <sup>4</sup>Department of Population Health Nursing Science, College of Nursing,  
8 University of Illinois – Chicago, Chicago, IL 60612, USA(NLT); <sup>5</sup>Sanford School of Medicine, University of  
9 South Dakota, Sioux Falls, SD 57105, USA (WSH).

10 **Authors last names:** McBurney, Tintle, Harris

11 **Corresponding author:** M.I. McBurney, Fatty Acid Research Institute, Sioux Falls, SD 57106, USA. E-mail:

12 [mim@faresinst.com](mailto:mim@faresinst.com)

13 **Reprint requests:** W.S. Harris, Fatty Acid Research Institute, Sioux Falls, SD 57106, USA. E-mail:

14 [wsh@faresinst.com](mailto:wsh@faresinst.com)

15 **Sources of Support:** This work was supported by the Fatty Acid Research Institute (FARI). FARI is a non-  
16 profit foundation bringing together nutrition scientists and biostatistical experts to accelerate discovery  
17 of the relationships between fatty acids, especially omega-3 fatty acids, and health. Analytic code will be  
18 made available upon request to the Fatty Acid Research Institute (<https://www.faresinst.org/>).

19 Running Title: Omega-3 Fatty Acids and Hematological Indices

20 **Abbreviations:** BMI, body mass index; CRP, high-sensitivity C-reactive protein; DHA, docosahexaenoic  
21 acid; eO3I, estimated omega-3 index; EPA, eicosapentaenoic acid; Hb, hemoglobin; Omega3%, total  
22 omega-3 fatty acid; NLR, neutrophil-lymphocyte ratio; O3I, omega-3 index; NMR, nuclear magnetic  
23 resonance; RDW, red blood cell distribution width.

24

25 **Abstract**

26 High red blood distribution width (RDW) is associated with decreased red blood cell deformability, and  
27 high neutrophil-lymphocyte ratio (NLR) is a biomarker of systemic inflammation and innate-adaptive  
28 immune system imbalance. Both RDW and NLR are predictors of chronic disease risk and mortality.  
29 Omega-3 index (O3I) values have previously been shown to be inversely associated with RDW and NLR  
30 levels. Our objective was to determine if total plasma long chain omega-3 fatty acids (Omega3%)  
31 measured in the UK Biobank cohort were associated with RDW and NLR values. RDW- and NLR-  
32 relationships with Omega3% were characterized in 109,191 adults (58.4% female). RDW- and NLR-  
33 Omega3% relationships were inversely associated with Omega3% (both  $p < 0.0001$ ). These cross-sectional  
34 associations confirm previous findings that increasing RDW and NLR values are associated with low O3I.  
35 The hypothesis that RDW and/or NLR values can be reduced in individuals with less-than optimal long  
36 chain omega 3 values need to be tested in randomized controlled intervention trials using EPA and/or  
37 DHA.

38  
39 **Keywords:** erythrocytes, neutrophil-lymphocyte ratio, red blood cell distribution width, long chain  
40 omega-3 fatty acids.

41

## 42 Introduction

43 A complete blood count is a routine component of medical exams that provides comprehensive  
44 hematologic information. Using standardized reference ranges, healthy individuals can be distinguished  
45 from those with nutrient deficiencies, infections, tissue damage, and inflammation. In addition to basic  
46 information provided by hemoglobin, hematocrit, and platelet and white blood cell counts, the red  
47 blood cell distribution width (RDW) is routinely used to diagnose anemias [1] and may be useful to  
48 assess overall wellness [2]. Another metric, the neutrophil-to-lymphocyte ratio (NLR), a measure of  
49 innate-adaptive immune balance, is used to monitor inflammation and immunity [3–6]. Risk of non-  
50 communicable disease and mortality has been associated with elevated RDW (**Table 1**) and NLR values  
51 (**Table 2**).

52 The long-chain omega-3 fatty acid (Omega3%) composition of all cell membranes (including blood  
53 cells) affects physicochemical properties such as fluidity, membrane protein function, signaling cascades,  
54 overall cell function and ultimately, host physiology [7–9]. The EPA DHA content of RBC membranes, i.e.,  
55 the Omega-3 Index (O3I) [10], reflects long-term dietary omega-3 intake [11] and the EPA+DHA  
56 composition of major organs [12]. Optimal O3I levels for cardiovascular health appear to be >8% [13].  
57 O3I is predictive of risk of total mortality in individuals without prevalent cardiovascular disease [14] and  
58 associated with mortality risk before and after adjustment for individual n-6 fatty acids, whether in  
59 aggregate, by carbon-chain groups, or individually [15]. A harmonized, de novo analysis of over 42,000  
60 individuals prospectively followed for over 16 years, with over 15,000 deaths observed, found risk for  
61 total mortality was 15-18% lower in the highest vs lowest quintile for long chain omega-3 fatty acids and  
62 similar relationships were observed for death from cardiovascular disease and cancer [16]. Increased  
63 dietary long chain omega-3 fatty acid intake increases red blood cell deformability [17–20], and frequent  
64 fish consumption is associated with lower NLR [21].

65 In previous studies using a clinical US laboratory database, a low O3I was inversely associated with  
66 RDW [22] and NLR [23]. The present study aims to confirm reported RDW and NLR relationships with  
67 Omega3% in a large and well-characterized cohort from the UK.

## 68 **Methods**

### 69 *Sample:*

70 The UK Biobank is a prospective, population-based cohort of 502,639 individuals, aged 40-69y,  
71 recruited between April 2007 and December 2010 [24,25]. Total long chain omega-3 fatty acids  
72 (Omega3%) and DHA (DHA%) were measured in plasma as a percent of total fatty acids by nuclear  
73 magnetic resonance (NMR, Nightingale Health Plc, Helsinki, Finland) [26] at enrollment. Within the  
74 cohort, 117,351 adults  $\geq 18$ y had data available for Omega3% and DHA%, and 109,191 also had complete  
75 data on RDW, neutrophil count, lymphocyte count, NLR, age, sex, body mass index (BMI), high-  
76 sensitivity C-reactive protein (CRP), and hemoglobin (Hb) (**Figure 1**). Since O3I was not measured in the  
77 UK Biobank, the O3I was calculated from Omega3% using the method of Schuchardt et al [27]. UK  
78 Biobank has ethical approval (Ref. 11/NW/0382) from the Northwest Multi-centre Research Ethics  
79 Committee as a Research Tissue Bank (RTB). All participants gave electronic signed informed consent.  
80 The UK Biobank study was conducted according to the guidelines laid down in the Declaration of  
81 Helsinki. The UK Biobank protocol is available online (<http://www.ukbiobank.ac.uk/wp114>  
82 [content/uploads/2011/11/UK-Biobank-Protocol.pdf](http://www.ukbiobank.ac.uk/wp114/content/uploads/2011/11/UK-Biobank-Protocol.pdf)). The University of South Dakota Institutional  
83 Review Board reviewed and approved the use of de-identified data for research purposes (IRB-21-147).

### 84 *Statistical methods*

85 Sample characteristics are summarized using standard statistical methods (e.g., means, SDs,  
86 correlations) with t-tests. Unadjusted linear models (Model 1) were used to predict RDW and NLR values  
87 by cubic splines of Omega3% and DHA%. Model 2 adjusted for sex, age, BMI, CRP and Hb values for

88 RDW and for sex, age, BMI, and CRP for NLR. Pearson correlations were used to assess the strength and  
89 direction of linear association between covariates and RDW or NLR. Statistical significance was set to  
90 0.05 for all analyses and 95% confidence bands are provided where appropriate.

91

## 92 **Results**

93 Dietary determinants of Omega3% status have been published for the UK Biobank cohort [27].  
94 Thirty-one percent of participants reported using fish oil supplements, and fatty fish were consumed by  
95 56% of the cohort, factors contributing to a mean Omega3% of 4.42% (**Table 3**) and O3I = 5.59% [27]. In  
96 this cohort of 109,191 individuals, the correlation between Omega3% and DHA% was  $r=0.88$ . Because  
97 Omega3% and DHA% were so highly correlated, only the Omega3% results for Model 1 are presented in  
98 the main text, with results for DHA% located in **Supplemental Figure 1**. Model 2 results for RDW- and  
99 NLR-relationships with Omega3% and DHA% are also located in **Supplemental Figures 2 and 3**,  
100 respectively.

101 RDW was significantly ( $p<0.0001$ ) and inversely associated with Omega3% (**Figure 2A**). Adjustments  
102 for age, sex, BMI, CRP and Hb (Model 2) did not significantly change the  $R^2$  nor the shape of the  
103 relationship (**Supplemental Figure 2**). Excluding 3,698 individuals with anemia (mean cell volume  $>100$ fL  
104 and/or Hb  $<13$ g/dL for males and Hb  $<12$ g/dL for females) as done by [22], did not significantly change  
105 the  $R^2$  for the RDW-Omega3% (data not presented).

106 NLR was significantly ( $p<0.0001$ ) and inversely associated with Omega3% (**Figure 3A**). Adjustments  
107 for age, sex, BMI and CRP (Model 2) did not significantly change the  $R^2$  nor the shape of the relationship  
108 (**Supplemental Figure 2**). Excluding 24,559 individuals with evidence of inflammation, i.e., CRP  $>3$  mg/L,  
109 as done by [23], did not significantly change NLR-Omega3% (data not presented).

110

111

## 112 Discussion

113 In this study examining the UK Biobank cohort, we confirm previously reported inverse associations  
114 of long chain omega-3 fatty acid concentrations with RDW [22] (**Figure 2**) and NLR [23] (**Figure 3**). The  
115 average estimated O3I of 5.59% in the UK Biobank cohort [27] is similar to that (~5.0%) reported in  
116 healthy individuals globally [28,29]. The average RDW in the UK Biobank cohort (13.5%) is similar to  
117 values (12.6-12.9%) reported in adults living in the US [30], including those free of cardiovascular disease  
118 (NHANES 1994-2004) [31] and without clinical evidence of anemia or inflammation [22]. The UK Biobank  
119 average NLR ( $2.36 \pm 1.20$ , **Table 3**) is similar to the ~2.2 of the US population [3,6] and a healthy cohort  
120 without evidence of anemia or inflammation [23].

121 Elevated RDW levels predict risk for several adverse health outcomes including death (**Table 1**). In  
122 four studies of apparently healthy, free-living individuals, the highest RDW category (Cn; top 20-25% of  
123 individuals) has an average HR=1.17 (vs C1) (**Table 4**). Thus, the observed distribution of mean RDW  
124 values across values of the Omega3% ( $13.85-13.40=0.45$  units) (**Figure 2A**) corresponds to a HR = 1.06 or  
125 a 6% increased risk of all-cause mortality associated with Omega3% when moving from the highest to  
126 lowest observed Omega3% values.

127 An elevated NLR has been associated with increased risk of cardiovascular events, lower respiratory  
128 disease, influenza, cancer, and mortality (**Table 2**). In two studies of free living, apparently healthy  
129 individuals, the average HR for mortality in the highest NLR category (Cn; top 20-25% of individuals) vs  
130 the lowest (C1) NLR (**Table 5**) was 1.43. As shown in Figure 3, there was a 0.7 difference in the mean NLR  
131 (1.7 to 2.4) across the observed Omega3% range (**Figure 3A**), which is equivalent to a HR = 1.24 or a 24%  
132 increased risk of all-cause mortality associated with Omega3% when moving from the highest to lowest  
133 observed Omega3% values.

134 The primary strengths of this study are the large sample of free-living individuals and that blood  
135 samples for RDW, NLR, and Omega3% measurements were taken at the same time. Consistent with

136 previous studies (**Figures 2B and 3A**) [22,23], monotonic inverse relationships were observed with long-  
137 chain omega-3 concentrations (**Figures 2A and 3A**). The higher RDW and NLR values observed in the UK  
138 Biobank cohort may reflect a higher prevalence of inflammation (UKBB mean CRP=2.60±4.40 mg/L vs  
139 Health Diagnostic Laboratory mean CRP=1.23± 0.77 mg/L) and differences in age (UKBB mean age  
140 =57.1±8.08 y vs Health Diagnostic Laboratory mean = 54.3±14.8 y). Among the limitations are the  
141 unavailability of data on levels of other n-3 fatty acids ( $\alpha$ -linolenic acid, EPA, and n-3 docosapentaenoic  
142 acid) and the potential for other unmeasured (or unconsidered) covariates that might have contributed  
143 to the observed associations. The major weakness of this and previous studies [22,23] is their cross-  
144 sectional natures which do not provide evidence of causality.

145 In conclusion, significant inverse relationships with RDW- and NLR- were identified with Omega3%  
146 and DHA%. These observations in the UK Biobank cohort using a different analytical method, i.e. NMR,  
147 confirm previously reported RDW- and NLR relationships with O3I, i.e. EPA+DHA [22,23]. We propose  
148 that low Omega3% may indicate a state that is less resilient and/or more predisposed to disease. We  
149 cautiously suggest that RDW- and NLR- relationships with Omega3% are clinically relevant and highly  
150 recommend that randomized controlled intervention trials using EPA and/or DHA be conducted to  
151 determine their effects on RDW and/or NLR values, particularly in individuals with less-than optimal long  
152 chain omega 3 values at baseline.

153

154 **CRedit authorship contribution statement: Michael I. McBurney:** Conceptualization, Writing – original  
155 draft, Writing – review & editing. **Nathan L. Tintle:** Formal analysis, Writing -reviewing & editing.

156 **William S. Harris:** Conceptualization, Funding acquisition, Writing – review & editing.

157

158 **Disclosures:** M.I. McBurney has or has held consulting agreements in the past 3 years with the Council  
159 for Responsible Nutrition; Church & Dwight; DSM Nutritional Products; International Life Sciences

160 Institute, North America; McCormick; PepsiCo; Smartech Topicals; and VitaMe Technologies. W.S. Harris  
161 holds an interest in OmegaQuant Analytics, a lab that offers omega-3 blood testing; and is a member of  
162 the RB Schiff Science and Innovation Advisory Board. N.L. Tintle has no conflicts to disclose.

163

164



165 **Citations**

- 166 [1] J.D. Bessman, P.R. Gilmer, F.H. Gardner, Improved Classification of Anemias by MCV and RDW, Am  
167 J Clin Pathol. 80 (1983) 322–326. <https://doi.org/10.1093/ajcp/80.3.322>.
- 168 [2] L.C. Pilling, J.L. Atkins, M.O. Duff, R.N. Beaumont, S.E. Jones, J. Tyrrell, C.-L. Kuo, K.S. Ruth, M.A.  
169 Tuke, H. Yaghootkar, A.R. Wood, A. Murray, M.N. Weedon, L.W. Harries, G.A. Kuchel, L. Ferrucci,  
170 T.M. Frayling, D. Melzer, Red blood cell distribution width: Genetic evidence for aging pathways in  
171 116,666 volunteers, PLoS ONE. 12 (2017) e0185083.  
172 <https://doi.org/10.1371/journal.pone.0185083>.
- 173 [3] B. Azab, M. Camacho-Rivera, E. Taioli, Average Values and Racial Differences of Neutrophil  
174 Lymphocyte Ratio among a Nationally Representative Sample of United States Subjects, PLoS ONE.  
175 9 (2014) e112361. <https://doi.org/10.1371/journal.pone.0112361>.
- 176 [4] J. Li, Q. Chen, X. Luo, J. Hong, K. Pan, X. Lin, X. Liu, L. Zhou, H. Wang, Y. Xu, H. Li, C. Duan,  
177 Neutrophil-to-lymphocyte ratio positively correlates to age in healthy population, J. Clin. Lab. Anal.  
178 29 (2015) 437–443. <https://doi.org/10.1002/jcla.21791>.
- 179 [5] A.M. Paul, S.D. Mhatre, E. Cekanaviciute, A.-S. Schreurs, C.G.T. Tahimic, R.K. Globus, S. Anand, B.E.  
180 Crucian, S. Bhattacharya, Neutrophil-to-lymphocyte ratio: A biomarker to monitor the immune  
181 status of astronauts, Front. Immunol. 11 (2020) 564950.  
182 <https://doi.org/10.3389/fimmu.2020.564950>.
- 183 [6] M. Song, B.I. Graubard, C.S. Rabkin, E.A. Engels, Neutrophil-to-lymphocyte ratio and mortality in  
184 the United States general population, Nature Res. 11 (2021) 464. [https://doi.org/10.1038/s41598-](https://doi.org/10.1038/s41598-020-79431-7)  
185 [020-79431-7](https://doi.org/10.1038/s41598-020-79431-7).
- 186 [7] T. Huber, K. Rajamoorthi, V.F. Kurze, K. Beyer, M.F. Brown, Structure of Docosahexaenoic Acid-  
187 Containing Phospholipid Bilayers as Studied by 2H NMR and Molecular Dynamics Simulations, J.  
188 Am. Chem. Soc. 124 (2002) 298–309. <https://doi.org/10.1021/ja011383j>.

- 189 [8] H.F. Turk, R.S. Chapkin, Membrane lipid raft organization is uniquely modified by n-3  
190 polyunsaturated fatty acids, *PLEFA*. 88 (2013) 43–47.
- 191 [9] P.C. Calder, Marine omega-3 fatty acids and inflammatory processes: Effects, mechanisms and  
192 clinical relevance, *Bioch. Biophys. Acta: Mol Cell Biol Lipids*. 1851 (2015) 469–484.  
193 <https://doi.org/10.1016/j.bbalip.2014.08.010>.
- 194 [10] W.S. Harris, C. von Schacky, The Omega-3 Index: a new risk factor for death from coronary heart  
195 disease?, *Prev. Med.* 39 (2004) 212–220. <https://doi.org/10.1016/j.ypmed.2004.02.030>.
- 196 [11] K.H. Jackson, J.M. Polreis, N.L. Tintle, P.M. Kris-Etherton, W.S. Harris, Association of reported fish  
197 intake and supplementation status with the omega-3 index, *Prostaglandins, Leukotrienes and*  
198 *Essential Fatty Acids*. 142 (2019) 4–10. <https://doi.org/10.1016/j.plefa.2019.01.002>.
- 199 [12] J.I. Fenton, E.A. Gutzell, E.A. Davidson, W.S. Harris, Red blood cell PUFAs reflect the phospholipid  
200 PUFA composition of major organs, *Prostaglandins, Leukotrienes and Essential Fatty Acids*. 112  
201 (2016) 12–23. <https://doi.org/10.1016/j.plefa.2016.06.004>.
- 202 [13] W.S. Harris, The Omega-3 Index: Clinical Utility for Therapeutic Intervention, *Curr Cardiol Rep*. 12  
203 (2010) 503–508. <https://doi.org/10.1007/s11886-010-0141-6>.
- 204 [14] M.I. McBurney, N.L. Tintle, R.S. Vasan, A. Sala-Vila, W.S. Harris, Using an erythrocyte fatty acid  
205 fingerprint to predict risk of all-cause mortality: the Framingham Offspring Cohort, *The American*  
206 *Journal of Clinical Nutrition*. (2021) nqab195. <https://doi.org/10.1093/ajcn/nqab195>.
- 207 [15] W. Harris, N. Tintle, V. Ramachandran, Erythrocyte n-6 fatty acids and risk for cardiovascular  
208 outcomes and total mortality in the Framingham Heart Study, *Nutrients*. 10 (2018) 2012.  
209 <https://doi.org/10.3390/nu10122012>.
- 210 [16] W.S. Harris, N.L. Tintle, F. Imamura, F. Qian, A.V. Ardisson Korat, M. Marklund, L. Djoussé, J.K.  
211 Bassett, P.-H. Carmichael, Y.-Y. Chen, Y. Hirakawa, L.K. Kupers, M. Lankinen, R.A. Murphy, C.  
212 Samieri, M.K. Senn, P. Shi, J.K. Virtanen, I.A. Brouwer, K.-L. Chien, G. Eiriksdottir, N.G. Forouhi, J.M.

- 213 Geleijnse, G.G. Giles, V. Gudnason, C. Helmer, A. Hodge, R. Jackson, K.-T. Khaw, M. Laakso, H. Lai,  
214 D. Laurin, J. Lindsay, R. Micha, J. Mursu, T. Ninomiya, W. Post, B.M. Psaty, U. Riserus, J.G.  
215 Robinson, A.H. Shadyab, L. Snetselaar, A. Sala-Vila, Y. Sun, L.M. Steffen, M.Y. Tsai, N.J. Wareham,  
216 A.C. Wood, J.H.Y. Wu, F. Hu, Q. Sun, D.S. Siscovick, R.N. Lemaitre, D. Mozaffarian, F. The Fatty  
217 Acids and Outcomes Research Consortium, Blood n-3 fatty acid levels and total and cause-specific  
218 mortality from 17 prospective studies, *Nature Commun.* 12 (2021) 1–9.  
219 <https://doi.org/10.1038/s41467-021-22370-2>.
- 220 [17] T. Terano, A. Hirai, T. Hamazaki, S. Kobayashi, T. Fujita, Y. Tamura, A. Kumagai, Effect of oral  
221 administration of highly purified eicosapentaenoic acid on platelet function, blood viscosity and  
222 red cell deformability in healthy human subjects, *Atherosclerosis.* 46 (1983) 321–331.
- 223 [18] I.J. Cartwright, A.G. Pockley, J.H. Galloway, M. Greaves, F.E. Preston, The effects of dietary omega-  
224 3 polyunsaturated fatty acids on erythrocyte membrane phospholipids, erythrocyte deformability  
225 and blood viscosity in healthy volunteers, *Atherosclerosis.* 55 (1985) 267–281.
- 226 [19] R. Bach, U. Schmidt, F. Jung, H. Kiesewetter, B. Hennen, E. Wenzel, H. Schieffer, L. Bette, S.  
227 Heyden, Effects of Fish Oil Capsules in Two Dosages on Blood Pressure, Platelet Functions,  
228 Haemorheological and Clinical Chemistry Parameters in Apparently Healthy Subjects, *Ann Nutr*  
229 *Metab.* 33 (1989) 359–367. <https://doi.org/10.1159/000177559>.
- 230 [20] E. Hessel, J.J. Agren, M. Paulitschke, O. Hanninen, A. Hanninen, D. Lerche, Freshwater fish diet  
231 affects lipid composition, deformability and aggregation properties of erythrocytes,  
232 *Atherosclerosis.* 82 (1990) 37–42.
- 233 [21] S. Tani, R. Matsuo, W. Atsumi, K. Kawauchi, T. Ashida, T. Yagi, K. Imatake, Y. Suzuki, A. Takahashi,  
234 N. Matsumoto, Y. Okumura, Higher frequency of fish intake may be associated with a lower  
235 neutrophil/lymphocyte ratio: Anti-atherosclerotic effects of fish consumption, *Ann Nutr Metab.*  
236 (2021) 1–8. <https://doi.org/10.1159/000515915>.

- 237 [22] M.I. McBurney, N.L. Tintle, W.S. Harris, Omega-3 index is directly associated with a healthy red  
238 blood cell distribution width, *Prostaglandins, Leukotrienes and Essential Fatty Acids*. 176 (2022)  
239 102376. <https://doi.org/10.1016/j.plefa.2021.102376>.
- 240 [23] M.I. McBurney, N.L. Tintle, W.S. Harris, The omega-3 index is inversely associated with the  
241 neutrophil-lymphocyte ratio in adults', *Prostaglandins, Leukotrienes and Essential Fatty Acids*. 177  
242 (2022) 102397. <https://doi.org/10.1016/j.plefa.2022.102397>.
- 243 [24] C. Sudlow, J. Gallacher, N. Allen, V. Beral, P. Burton, J. Danesh, P. Downey, P. Elliott, J. Green, M.  
244 Landray, B. Liu, P. Matthews, G. Ong, J. Pell, A. Silman, A. Young, T. Sprosen, T. Peakman, R. Collins,  
245 UK Biobank: An open access resource for identifying the causes of a wide range of complex  
246 diseases of middle and old age, *PLoS Med*. 12 (2015) e1001779.  
247 <https://doi.org/10.1371/journal.pmed.1001779>.
- 248 [25] H. Julkunen, A. Cichońska, P.E. Slagboom, P. Würtz, Nightingale Health UK Biobank Initiative,  
249 Metabolic biomarker profiling for identification of susceptibility to severe pneumonia and COVID-  
250 19 in the general population, *ELife*. 10 (2021) e63033. <https://doi.org/10.7554/eLife.63033>.
- 251 [26] P. Wurtz, J.R. Raiko, C.G. Magnussen, P. Soininen, A.J. Kangas, T. Tynkkynen, R. Thomson, R.  
252 Laatikainen, M.J. Savolainen, J. Laurikka, P. Kuukasjarvi, M. Tarkka, P.J. Karhunen, A. Jula, J.S.  
253 Viikari, M. Kahonen, T. Lehtimaki, M. Juonala, M. Ala-Korpela, O.T. Raitakari, High-throughput  
254 quantification of circulating metabolites improves prediction of subclinical atherosclerosis,  
255 *European Heart Journal*. 33 (2012) 2307–2316. <https://doi.org/10.1093/eurheartj/ehs020>.
- 256 [27] J.P. Schuchardt, N. Tintle, J. Westra, W.S. Harris, Estimation and predictors of the Omega-3 Index in  
257 the UK Biobank, *Br J Nutr*. (2022) 1–40. <https://doi.org/10.1017/S0007114522003282>.
- 258 [28] J.P. Schuchardt, M. Cerrato, M. Ceseri, L.F. DeFina, G.E. Delgado, S. Gellert, A. Hahn, B.V. Howard,  
259 A. Kadota, M.E. Kleber, R. Latini, W. Maerz, J.E. Manson, S. Mora, Y. Park, A. Sala-Vila, C. von  
260 Schacky, A. Sekikawa, N. Tintle, K.L. Tucker, R.S. Vasan, W.S. Harris, Red blood cell fatty acid

- 261 patterns from 7 countries: Focus on the Omega-3 index, Prostaglandins, Leukotrienes and Essential  
262 Fatty Acids. 179 (2022) 102418. <https://doi.org/10.1016/j.plefa.2022.102418>.
- 263 [29] K.D. Stark, M.E. Van Elswyk, M.R. Higgins, C.A. Weatherford, N. Salem, Global survey of the omega-  
264 3 fatty acids, docosahexaenoic acid and eicosapentaenoic acid in the blood stream of healthy  
265 adults, *Prog. Lipid Res.* 63 (2016) 132–152. <https://doi.org/10.1016/j.plipres.2016.05.001>.
- 266 [30] J.M. Crook, A.L. Horgas, S.L. Yoon, O. Grundmann, V. Johnson-Mallard, Vitamin C Plasma Levels  
267 Associated with Inflammatory Biomarkers, CRP and RDW: Results from the NHANES 2003–2006  
268 Surveys, *Nutrients.* 14 (2022) 1254. <https://doi.org/10.3390/nu14061254>.
- 269 [31] V. Veeranna, S.K. Zalawadiya, S. Panaich, K.V. Patel, L. Afonso, Comparative analysis of red cell  
270 distribution width and high sensitivity C-reactive protein for coronary heart disease mortality  
271 prediction in multi-ethnic population: Findings from the 1999–2004 NHANES, *Int. J. Cardiol.* 168  
272 (2013) 5156–5161. <https://doi.org/10.1016/j.ijcard.2013.07.109>.
- 273 [32] Q. Li, X. Chen, B. Han, Red blood cell distribution width is associated with frailty in older inpatients  
274 in China: Sex differences in a cross-sectional study, *Experimental Gerontology.* 150 (2021) 111392.  
275 <https://doi.org/10.1016/j.exger.2021.111392>.
- 276 [33] E.M. Hald, M.-L. Løchen, J. Lappegård, T.S. Ellingsen, E.B. Mathiesen, T. Wilsgaard, I. Njølstad, S.K.  
277 Brækkan, J.-B. Hansen, Red Cell Distribution Width and Risk of Atrial Fibrillation and Subsequent  
278 Thromboembolism: The Tromsø Study, *TH Open.* 04 (2020) e280–e287. [https://doi.org/10.1055/s-](https://doi.org/10.1055/s-0040-1716417)  
279 [0040-1716417](https://doi.org/10.1055/s-0040-1716417).
- 280 [34] H.-M. Yao, T.-W. Sun, X.-J. Zhang, D.-L. Shen, Y.-Y. Du, Y.-D. Wan, J.-Y. Zhang, L. Li, L.-S. Zhao, Red  
281 blood cell distribution width and long-term outcome in patients undergoing percutaneous  
282 coronary intervention in the drug-eluting stenting era: A two-year cohort study, *PLoS ONE.* 9  
283 (2014) e94887. <https://doi.org/10.1371/journal.pone.0094887>.

- 284 [35] T. Osadnik, J. Strzelczyk, M. Hawranek, A. Lekston, J. Wasilewski, A. Kurek, A.R. Gutowski, K.  
285 Wilczek, K. Dyrbuś, M. Gierlotka, A. Wiczowski, M. Gąsior, A. Szafranek, L. Poloński, Red cell  
286 distribution width is associated with long-term prognosis in patients with stable coronary artery  
287 disease, *BMC Cardiovasc Disord.* 13 (2013) 113. <https://doi.org/10.1186/1471-2261-13-113>.
- 288 [36] S.K. Zalawadiya, V. Veeranna, S.S. Panaich, L. Afonso, J.K. Ghali, Gender and Ethnic Differences in  
289 Red Cell Distribution Width and Its Association With Mortality Among Low Risk Healthy United  
290 State Adults, *The American Journal of Cardiology.* 109 (2012) 1664–1670.  
291 <https://doi.org/10.1016/j.amjcard.2012.01.396>.
- 292 [37] S.K. Zalawadiya, V. Veeranna, S.S. Panaich, L. Afonso, Red cell distribution width and risk of  
293 peripheral artery disease: Analysis of National Health and Nutrition Examination Survey 1999–  
294 2004, *Vasc Med.* 17 (2012) 155–163. <https://doi.org/10.1177/1358863X12442443>.
- 295 [38] T.S. Perlstein, J. Weuve, M.A. Pfeffer, J.A. Beckman, Red blood cell distribution width and mortality  
296 risk in a community-based prospective cohort, *Arch Intern Med.* 169 (2009) 588.  
297 <https://doi.org/10.1001/archinternmed.2009.55>.
- 298 [39] K.V. Patel, L. Ferrucci, W.B. Ershler, D.L. Longo, J.M. Guralnik, Red blood cell distribution width and  
299 the risk of death in middle-aged and older adults, *Arch Intern Med.* 169 (2009) 515.  
300 <https://doi.org/10.1001/archinternmed.2009.11>.
- 301 [40] J. Guo, H. Zhang, Y. Li, M. Hao, G. Shi, J. Wang, Z. Wang, X. Wang, Neutrophil-lymphocyte ratio as a  
302 predictor of slow gait speed in older adults: The Rugao Longitudinal Aging Study, *Experimental*  
303 *Gerontology.* 152 (2021) 111439. <https://doi.org/10.1016/j.exger.2021.111439>.
- 304 [41] N.H. Adamstein, J.G. MacFadyen, L.M. Rose, R.J. Glynn, A.K. Dey, P. Libby, I.A. Tabas, N.N. Mehta,  
305 P.M. Ridker, The neutrophil–lymphocyte ratio and incident atherosclerotic events: analyses from  
306 five contemporary randomized trials, *European Heart Journal.* 42 (2021) 896–903.  
307 <https://doi.org/10.1093/eurheartj/ehaa1034>.

- 308 [42] H. Wada, T. Dohi, K. Miyauchi, R. Nishio, M. Takeuchi, N. Takahashi, H. Endo, M. Ogita, H. Iwata, T.  
309 Kasai, S. Okazaki, K. Isoda, S. Suwa, H. Daida, Neutrophil to lymphocyte ratio and long-term  
310 cardiovascular outcomes in coronary artery disease patients with low high-sensitivity C-reactive  
311 protein level, *Int. Heart J.* 61 (2020) 447–453. <https://doi.org/10.1536/ihj.19-543>.
- 312 [43] J.-H. Liu, Y.-J. Zhang, Q.-H. Ma, H.-P. Sun, Y. Xu, C.-W. Pan, Elevated blood neutrophil to  
313 lymphocyte ratio in older adults with cognitive impairment, *Archives of Gerontology and*  
314 *Geriatrics.* 88 (2020) 104041. <https://doi.org/10.1016/j.archger.2020.104041>.
- 315 [44] J. Fest, T.R. Ruiter, B. Groot Koerkamp, D. Rizopoulos, M.A. Ikram, C.H.J. van Eijck, B.H. Stricker,  
316 The neutrophil-to-lymphocyte ratio is associated with mortality in the general population: The  
317 Rotterdam Study, *Eur J Epidemiol.* 34 (2019) 463–470. [https://doi.org/10.1007/s10654-018-0472-](https://doi.org/10.1007/s10654-018-0472-y)  
318 [y](https://doi.org/10.1007/s10654-018-0472-y).
- 319 [45] B. Suh, D.W. Shin, H.-M. Kwon, J.M. Yun, H.-K. Yang, E. Ahn, H. Lee, J.H. Park, B. Cho, Elevated  
320 neutrophil to lymphocyte ratio and ischemic stroke risk in generally healthy adults, *PLoS ONE.* 12  
321 (2017) e0183706. <https://doi.org/10.1371/journal.pone.0183706>.

322

323

Table 1. Odds Ratio (OR) or Hazards Ratio (HR) per 0.01 unit increase in red blood cell distribution width (RDW) with respect to clinical outcome.

| Outcome                           | Population                                                                     | Study                                              | n      | Quantile of RDW |              |              |        |   | OR or HR (95% CI)   | p-value      | Citation |
|-----------------------------------|--------------------------------------------------------------------------------|----------------------------------------------------|--------|-----------------|--------------|--------------|--------|---|---------------------|--------------|----------|
|                                   |                                                                                |                                                    |        | 1               | 2            | 3            | 4      | 5 |                     |              |          |
| Frailty                           | Hospitalized men, ≥60y                                                         | Comprehensive tertiary hospital in mainland China  | 334    | ≤12.6%          | 12.6-13.1%   | 13.1-13.7%   | >13.7% |   | OR=1.14 (1.05-1.24) | 0.002        | [32]     |
| Frailty                           | Hospitalized women, ≥60y                                                       | Comprehensive tertiary hospital in mainland China  | 285    | ≤12.6%          | 12.6-13.1%   | 13.1-13.7%   | >13.7% |   | OR=1.27 (1.16-1.38) | <0.001       | [32]     |
| Incident atrial fibrillation (AF) | Adults ≥25y                                                                    | inhabitants of Tromso, Norway                      | 26,111 | <12.3%          | 12.4-12.7%   | 12.8-13.2%   | ≥13.3% |   | HR=1.08 (1.03-1.12) | Not reported | [3]      |
| Venous thromboembolism            | Adults with AF ≥25y                                                            | inhabitants of Tromso, Norway                      | 1,812  | <12.7%          | 12.8-13.3%   | >13.3%       |        |   | HR=1.09 (0.83-1.41) | Not reported | [3]      |
| Ischemic stroke                   | Adults with AF ≥25y                                                            | inhabitants of Tromso, Norway                      | 1,812  | <12.7%          | 12.8-13.3%   | >13.3%       |        |   | HR=1.18 (1.03-1.34) | Not reported | [3]      |
| In-hospital mortality             | Patients without anemia who underwent percutaneous coronary intervention (PCI) | Affiliated hospital of Zhengzhou University, China | 2,169  | <12.27%         | 12.27-≤13.0% | >13-<13.5%   | ≥13.5% |   | HR=1.4 (1.23-1.59)  | 0.000        | [4]      |
| All-cause mortality               | Patients with stable coronary artery disease undergoing stent implantation     | Silesian Centre for Heart Diseases, Poland         | 2,033  | <13.1%          | 13.1-<13.6%  | 13.6-<14.1%  | ≥14.1% |   | HR=1.23 (1.13-1.35) | <0.0001      | [5]      |
| All deaths, men                   | Adults ≥20y without diabetes or CV                                             | NHANES 1988-1994, USA                              | 7,201  | ≤12.4%          | >12.4-≤12.9% | >12.9-≤13.5% | >13.5% |   | HR=1.21 (1.18-1.25) | <0.001       | [6]      |
| All deaths, women                 | Adults ≥20y without diabetes or previous CV                                    | NHANES 1988-1994, USA                              | 8,259  | ≤12.4%          | >12.4-≤12.9% | >12.9-≤13.5% | >13.5% |   | HR=1.19 (1.14-1.24) | <0.001       | [36]     |
| All CV deaths, men                | Adults ≥20y without diabetes or previous CV                                    | NHANES 1988-1994, USA                              | 7,201  | ≤12.4%          | >12.4-≤12.9% | >12.9-≤13.5% | >13.5% |   | HR=1.19 (1.14-1.25) | <0.001       | [36]     |
| All CV deaths, women              | Adults ≥20y without diabetes or previous CV                                    | NHANES 1988-1994, USA                              | 8,259  | ≤12.4%          | >12.4-≤12.9% | >12.9-≤13.5% | >13.5% |   | HR=1.19 (1.12-1.26) | <0.001       | [36]     |

medRxiv preprint doi: <https://doi.org/10.1101/2022.12.09.22283290>; this version posted December 13, 2022. The copyright holder for this preprint (which was not certified by peer review) is the author/funder, who has granted medRxiv a license to display the preprint in perpetuity. It is made available under a CC-BY-NC-ND 4.0 International license.



|                                                   |                                             |                       |        |         |              |              |              |         |                     |        |      |
|---------------------------------------------------|---------------------------------------------|-----------------------|--------|---------|--------------|--------------|--------------|---------|---------------------|--------|------|
| Coronary heart disease (CHD) deaths, men          | Adults ≥20y without diabetes or previous CV | NHANES 1988-1994, USA | 7,201  | ≤12.4%  | >12.4-≤12.9% | >12.9-≤13.5% | >13.5%       |         | HR=1.20 (1.12-1.28) | <0.001 | [36] |
| CHD deaths, women                                 | Adults ≥20y without diabetes or previous CV | NHANES 1988-1994, USA | 8,259  | ≤12.4%  | >12.4-≤12.9% | >12.9-≤13.5% | >13.5%       |         | HR=1.20 (1.11-1.29) | <0.001 | [36] |
| Peripheral artery disease                         | Adults ≥40y                                 | NHANES 1999-2004, USA | 6,950  | <12.2%  | 12.3-12.5%   | 12.6-13.1%   | >13.1%       |         | HR=1.23 (1.14-1.33) | <0.001 | [37] |
| All-cause mortality                               | Adults ≥40y                                 | NHANES 1988-1994, USA | 15,852 | <12.35% | 12.5-12.65%  | 12.8-13.15%  | 13.2-13.75%  | ≥13.80% | HR=1.27 (1.21-1.33) | <0.001 | [38] |
| CV mortality                                      | Adults ≥40y                                 | NHANES 1988-1994, USA | 15,852 | <12.35% | 12.5-12.65%  | 12.8-13.15%  | 13.2-13.75%  | ≥13.80% | HR=1.26 (1.19-1.33) | <0.001 | [38] |
| Cancer mortality                                  | Adults ≥40y                                 | NHANES 1988-1994, USA | 15,582 | <12.35% | 12.5-12.65%  | 12.8-13.15%  | 13.2-13.75%  | ≥13.80% | HR=1.30 (1.22-1.39) | <0.001 | [38] |
| Chronic lower respiratory tract disease mortality | Adults ≥40y                                 | NHANES 1988-1994, USA | 15,582 | <12.35% | 12.5-12.65%  | 12.8-13.15%  | 13.2-13.75%  | ≥13.80% | HR=1.36 (1.29-1.51) | 0.03   | [8]  |
| All-cause mortality                               | Adults ≥45y                                 | NHANES 1988-1994, USA | 8,175  | <12.55% | 12.55-12.95% | 13.0-13.4%   | 13.45-14.05% | >14.05% | HR=1.22 (1.15-1.30) | <0.001 | [9]  |

medRxiv preprint doi: <https://doi.org/10.1101/2022.12.09.22283290>; this version posted December 13, 2022. The copyright holder for this preprint (which was not certified by peer review) is the author/funder, who has granted medRxiv a license to display the preprint in perpetuity. It is made available under a [CC-BY-NC-ND 4.0 International license](#).

4  
5  
6

Table 2. Odds Ratio (OR) or Hazards Ratio (HR) per increase in neutrophil-lymphocyte ratio (NLR) with respect to clinical outcome.

| Outcome                                                                          | Population                                                  | Study                                          | n      | Quantiles of NLR |             |             |       |   |   | OR or HR                           | p-value | Citation |
|----------------------------------------------------------------------------------|-------------------------------------------------------------|------------------------------------------------|--------|------------------|-------------|-------------|-------|---|---|------------------------------------|---------|----------|
|                                                                                  |                                                             |                                                |        | 1                | 2           | 3           | 4     | 5 | 6 |                                    |         |          |
| Slow gait                                                                        | Adults ≥70y                                                 | Rugao Longitudinal Aging Study, China          | 1,753  | ≤1.29            | >1.29-≤1.79 | >1.79-≤2.36 | >2.36 |   |   | OR <sup>1</sup> =2.73 (1.60-4.68)  | <0.001  | [40]     |
| All-cause mortality                                                              | Adults ≥30y                                                 | NHANES 1999-2014, USA                          | 32,454 | <1.54            | 1.54-2.00   | 2.01-2.67   | >2.67 |   |   | HR <sup>2</sup> =1.14 (1.10-1.17)  | <0.0001 | [6]      |
| Heart disease mortality                                                          | Adults ≥30y                                                 | NHANES 1999-2014, USA                          | 900    | <1.54            | 1.54-2.00   | 2.01-2.67   | >2.67 |   |   | HR <sup>2</sup> =1.17 (1.06-1.29)  | 0.002   | [6]      |
| Chronic lower respiratory disease mortality                                      | Adults ≥30y                                                 | NHANES 1999-2014, USA                          | 197    | <1.54            | 1.54-2.00   | 2.01-2.67   | >2.67 |   |   | HR <sup>2</sup> =1.24 (1.04-1.47)  | 0.02    | [6]      |
| Influenza/pneumonia mortality                                                    | Adults ≥30y                                                 | NHANES 1999-2014, USA                          | 82     | <1.54            | 1.54-2.00   | 2.01-2.67   | >2.67 |   |   | HR <sup>2</sup> =1.26 (1.03-1.54)  | 0.03    | [6]      |
| Kidney disease mortality                                                         | Adults ≥30y                                                 | NHANES 1999-2014, USA                          | 89     | <1.54            | 1.54-2.00   | 2.01-2.67   | >2.67 |   |   | HR <sup>2</sup> =1.62 (1.21-2.17)  | 0.001   | [6]      |
| All-cause mortality in individuals with prior myocardial infarction (MI), CANTOS | Adults with prior myocardial infarction (MI) and CRP ≥2mg/L | Canakinumab Thrombosis Outcomes Study (CANTOS) | 10,061 | ≤1.81            | 1.81-≤2.36  | 2.37-≤3.08  | >3.08 |   |   | HR <sup>2</sup> = 1.36 (1.30-1.46) | <0.0001 | [41]     |
| Cardiovascular (CV) death, CANTOS                                                | Adults with prior myocardial infarction (MI) and CRP ≥2mg/L | Canakinumab Thrombosis Outcomes Study (CANTOS) | 10,061 | ≤1.81            | 1.81-≤2.36  | 2.37-≤3.08  | >3.08 |   |   | 1.36 <sup>2</sup> (1.27-1.46)      | <0.0001 | [41]     |
| Major adverse cardiovascular event (MACE): non-fatal                             | Adults with prior myocardial                                | Canakinumab Thrombosis Outcomes                | 10,061 | ≤1.81            | 1.81-≤2.36  | 2.37-≤3.08  | >3.08 |   |   | HR <sup>2</sup> =1.22 (1.16-1.28)  | <0.0001 | [41]     |

|                                                                                      |                                                                                                             |                                                                                                             |        |             |                   |                   |          |  |  |  |                                   |            |      |
|--------------------------------------------------------------------------------------|-------------------------------------------------------------------------------------------------------------|-------------------------------------------------------------------------------------------------------------|--------|-------------|-------------------|-------------------|----------|--|--|--|-----------------------------------|------------|------|
| MI, non-fatal stroke or CV death                                                     | infarction (MI) and CRP $\geq 2$ mg/L                                                                       | Study (CANTOS)                                                                                              |        |             |                   |                   |          |  |  |  |                                   |            |      |
| MACE + hospitalization of unstable angina requiring urgent revascularization (MACE+) | Adults with prior myocardial infarction (MI) and CRP $\geq 2$ mg/L                                          | Canakinumab Thrombosis Outcomes Study (CANTOS)                                                              | 10,061 | $\leq 1.81$ | 1.81- $\leq 2.36$ | 2.37- $\leq 3.08$ | $> 3.08$ |  |  |  | HR <sup>2</sup> =1.20 (1.14-1.25) | $< 0.0001$ | [41] |
| MACE+                                                                                | Healthy patients with LDL-C $< 130$ mg/dL and CRP $\geq 2$ mg/L                                             | Justification for the Use of Statins in Prevention: An Intervention Trial Evaluating Rosuvastatin (JUPITER) | 17,802 | $\leq 1.58$ | 1.58- $\leq 2.10$ | 2.10- $\leq 2.75$ | $> 2.75$ |  |  |  | HR <sup>2</sup> =1.11 (1.01-1.22) | 0.03       | [41] |
| MACE+                                                                                | Patients with prior CV event and LDL-C $\geq 70$ mg/dL                                                      | PCSK9 Inhibition and the Reduction of Vascular Events (SPIRE-1)                                             | 16,819 | $\leq 1.72$ | 1.72- $\leq 2.24$ | 2.24- $\leq 2.93$ | $> 2.93$ |  |  |  | HR <sup>2</sup> =1.31 (1.14-1.49) | 0.00007    | [41] |
| MACE+                                                                                | Patients with prior CV event and LDL-C $\geq 100$ mg/dL                                                     | PCSK9 Inhibition and the Reduction of Vascular Events (SPIRE-2)                                             | 10,621 | $\leq 1.67$ | 1.67- $\leq 2.16$ | 2.16- $\leq 2.83$ | $> 2.83$ |  |  |  | HR <sup>2</sup> =1.27 (1.12-1.43) | 0.0002     | [41] |
| MACE+                                                                                | Patients with previous MI or multi-vessel coronary disease and either type 2 diabetes or metabolic syndrome | Cardiovascular Inflammation Reduction Trial (CIRT)                                                          | 4,768  | $\leq 1.73$ | 1.73- $\leq 2.27$ | 2.27- $\leq 2.96$ | $> 2.96$ |  |  |  | HR <sup>2</sup> =1.09 (1.00-1.20) | 0.045      | [41] |

|                                                                                                                                                                                           |                                                                                                       |                                           |        |        |             |             |           |          |      |  |                                   |        |      |
|-------------------------------------------------------------------------------------------------------------------------------------------------------------------------------------------|-------------------------------------------------------------------------------------------------------|-------------------------------------------|--------|--------|-------------|-------------|-----------|----------|------|--|-----------------------------------|--------|------|
| CV events: CV death, non-fatal MI, and non-fatal stroke                                                                                                                                   | Patients with coronary artery disease who underwent elective percutaneous coronary intervention (PCI) | Juntendo University Hospital, Japan       | 1,951  | <1.5   | 1.5-1.9     | 1.9-2.5     | ≥2.5      |          |      |  | HR <sup>1</sup> =1.85 (1.19-2.88) | 0.007  | [42] |
| Cognitive impairment                                                                                                                                                                      | Adults ≥60y, community dwelling                                                                       | Weitang Geriatric Diseases Study, China   | 4,579  | <1.535 | 1.535-2.022 | 2.023-2.641 | >2.641    |          |      |  | HR <sup>3</sup> =1.11 (1.03-1.20) | 0.02   | [43] |
| All-cause mortality                                                                                                                                                                       | Adults ≥45y, community dwelling                                                                       | Rotterdam Study, The Netherlands          | 8,715  | <1.30  | 1.30-1.59   | 1.60-1.91   | 1.92-2.41 | >2.41    |      |  | HR <sup>4</sup> =1.64 (1.44-1.86) | <0.001 | [44] |
| Ischemic stroke                                                                                                                                                                           | Adults, 30-75y, undergoing general health screening                                                   | Seoul National University Hospital, Korea | 24,708 | <1.5   | 1.5-<2.0    | 2.0-<2.5    | 2.5-<3.0  | 3.0-<3.5 | >3.5 |  | HR <sup>4</sup> =2.96 (1.57-5.58) | <0.001 | [45] |
| <sup>1</sup> per 1 unit increase in logNLR.<br><sup>2</sup> Per category increase in NLR.<br><sup>3</sup> per SD increase in logNLR.<br><sup>4</sup> comparing highest vs lowest quartile |                                                                                                       |                                           |        |        |             |             |           |          |      |  |                                   |        |      |

**Table 3.** Variable distributions (Mean±SD) for entire UK Biobank cohort.

| Variable                                                                                                                       | All <sup>1</sup> | Female     | Male <sup>2</sup>         |
|--------------------------------------------------------------------------------------------------------------------------------|------------------|------------|---------------------------|
| n                                                                                                                              | 101,191          | 59,113     | 50,078                    |
| DHA, %                                                                                                                         | 2.01±0.68        | 2.12±0.66  | 1.88±0.68 <sup>329</sup>  |
| Omega3, %                                                                                                                      | 4.42 (1.56)      | 4.6 (1.58) | 4.21 (1.5)                |
| RDW %                                                                                                                          | 13.49±0.98       | 13.32±1.05 | 13.45±0.89 <sup>330</sup> |
| NLR                                                                                                                            | 2.36±1.20        | 2.26±1.09  | 2.48±1.31 <sup>331</sup>  |
| Neutrophil, 10 <sup>3</sup> /μL                                                                                                | 4.22±1.42        | 4.19±1.40  | 4.26±1.45                 |
| Lymphocyte, 10 <sup>3</sup> /μL                                                                                                | 1.96±1.04        | 2.01±0.89  | 1.90±1.19 <sup>332</sup>  |
| Age, y                                                                                                                         | 57.06±8.08       | 56.89±7.98 | 57.27±8.19                |
| BMI, kg/m <sup>2</sup>                                                                                                         | 27.42±4.77       | 27.08±5.15 | 27.84±4.23 <sup>333</sup> |
| CRP, mg/L                                                                                                                      | 2.60±4.40        | 2.69±4.33  | 2.49±4.49                 |
| Deprivation Score <sup>2</sup>                                                                                                 | -1.33±3.09       | -1.36±3.04 | -1.29±3.14 <sup>334</sup> |
| Hb, g/dL                                                                                                                       | 14.17±1.24       | 13.49±0.96 | 14.98±1.03 <sup>335</sup> |
| <sup>1</sup> Based on self-identified social construct for race: 94.58% White, 0.57% Black, 1.91% Asian, and 2.94% Other.      |                  |            |                           |
| <sup>2</sup> With the exception of number (n), variable means are statistically different between females and males, p<0.0001. |                  |            |                           |

338

**Table 4.** Mortality Hazard Ratio (HR) comparing the highest (top 20-25% of individuals) and lowest (bottom 20-25% of individuals) categories in red blood cell distribution width (RDW) in apparently healthy, free-living individuals.

| Outcome                                  | Population                                  | Study                 | n      | RDW (%) Cn-C1 <sup>1</sup> | HR (95% CI)       | p-value | Citation |
|------------------------------------------|---------------------------------------------|-----------------------|--------|----------------------------|-------------------|---------|----------|
| Coronary heart disease (CHD) deaths, men | Adults ≥20y without diabetes or previous CV | NHANES 1988-1994, USA | 7,201  | 1.10                       | 1.19 (1.16-1.22)  | <0.001  | [36]     |
| CHD deaths, women                        | Adults ≥20y without diabetes or previous CV | NHANES 1988-1994, USA | 8,259  | 1.10                       | 1.17 (1.13, 1.22) | <0.001  | [36]     |
| All-cause mortality                      | Adults ≥40y                                 | NHANES 1988-1994, USA | 15,852 | 1.45                       | 1.18 (1.14, 1.22) | <0.001  | [38]     |
| All-cause mortality                      | Adults ≥45y                                 | NHANES 1988-1994, USA | 8,175  | 1.50                       | 1.14 (1.10, 1.19) | <0.001  | [39]     |
| Average                                  |                                             |                       |        | 1.29                       | 1.17              |         |          |

<sup>1</sup> Highest category (Cn) minus lowest C1.

339

340

| Table 5. Mortality Hazards Ratio (HR) comparing the highest (top 20-25% of individuals) and lowest categories (bottom 20-25% of individuals) in neutrophil-lymphocyte ratio (NLR). |                                 |                                  |        |                        |                   |         |          |
|------------------------------------------------------------------------------------------------------------------------------------------------------------------------------------|---------------------------------|----------------------------------|--------|------------------------|-------------------|---------|----------|
| Outcome                                                                                                                                                                            | Population                      | Study                            | n      | NLR Cn-C1 <sup>1</sup> | HR (95% CI)       | p-value | Citation |
| All-cause mortality                                                                                                                                                                | Adults ≥30y                     | NHANES 1999-2014, USA            | 32,454 | 1.4                    | 1.30 (1.21, 1.41) | <0.0001 | [6]      |
| All-cause mortality                                                                                                                                                                | Adults ≥45y, community dwelling | Rotterdam Study, The Netherlands | 8,715  | 1.11                   | 1.56 (1.39, 1.75) | <0.001  | [44]     |
| Average                                                                                                                                                                            |                                 |                                  |        | 1.26                   | 1.43              |         |          |

<sup>1</sup> Highest category (Cn) minus lowest C1.

341

342

343 Figure 1. Analytical sample flow chart. Hb, hemoglobin; NLR, neutrophil-lymphocyte ratio; RDW, red blood cell  
344 distribution width; CRP, C-reactive protein.

345

346 Figure 2. A. Unadjusted red blood cell distribution width (RDW) relationship with omega-3 percentage  
347 (Omega3%). Omega-3 Index (O3I) values calculated using the conversion equation [O3I = 1.2791\*Omega3%+  
348 1.0589 (R2=0.59; r=0.77)]. B. Unadjusted RDW relationship with the Omega-3 Index (O3I) adapted from  
349 McBurney et al (22).

350

351 Figure 3. A. Unadjusted neutrophil-lymphocyte ratio (NLR) relationship with omega-3 percentage (Omega3%).  
352 Omega-3 Index (O3I) values calculated using the conversion equation [O3I = 1.2791\*Omega3%+ 1.0589  
353 (R2=0.59; r=0.77)]. B. Unadjusted NLR relationship with the Omega-3 Index (O3I) adapted from McBurney et al  
354 (23).

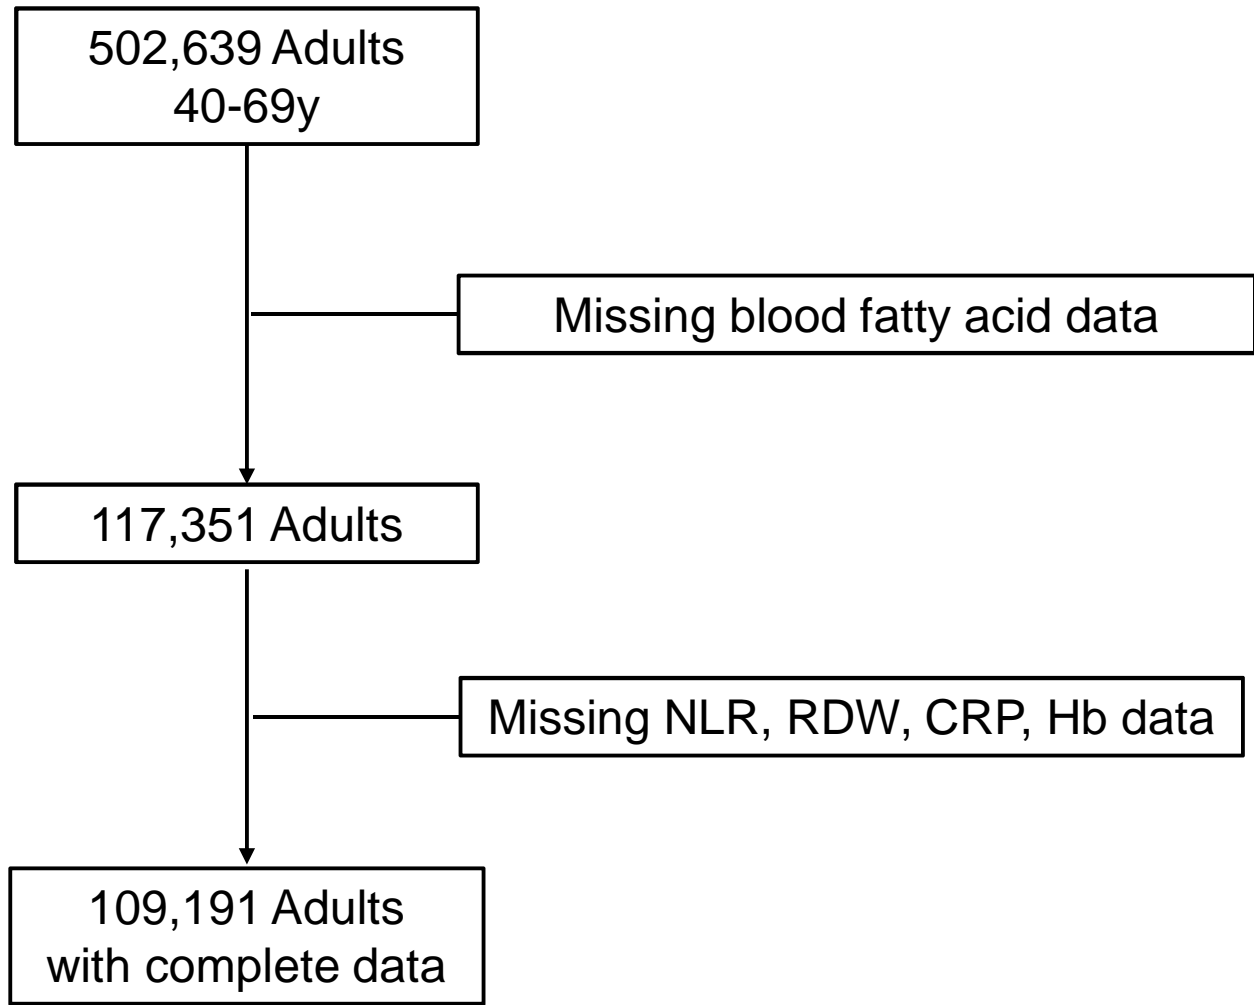

It is made available under a [CC-BY-NC-ND 4.0 International license](https://creativecommons.org/licenses/by-nc-nd/4.0/) .

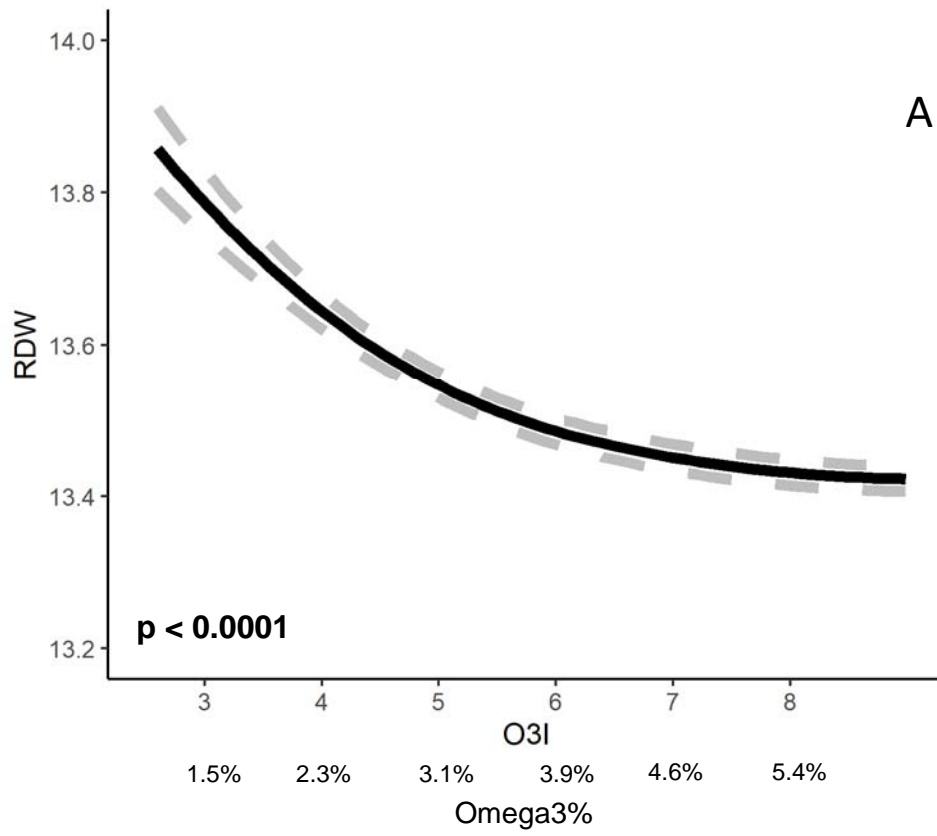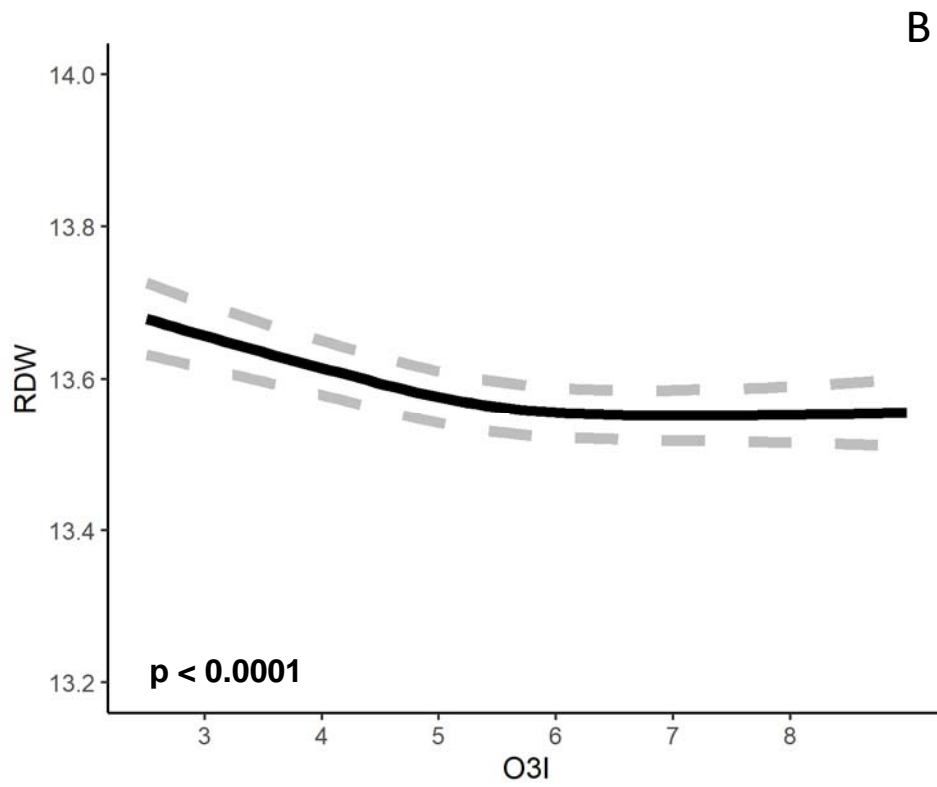



It is made available under a [CC-BY-NC-ND 4.0 International license](https://creativecommons.org/licenses/by-nc-nd/4.0/) .

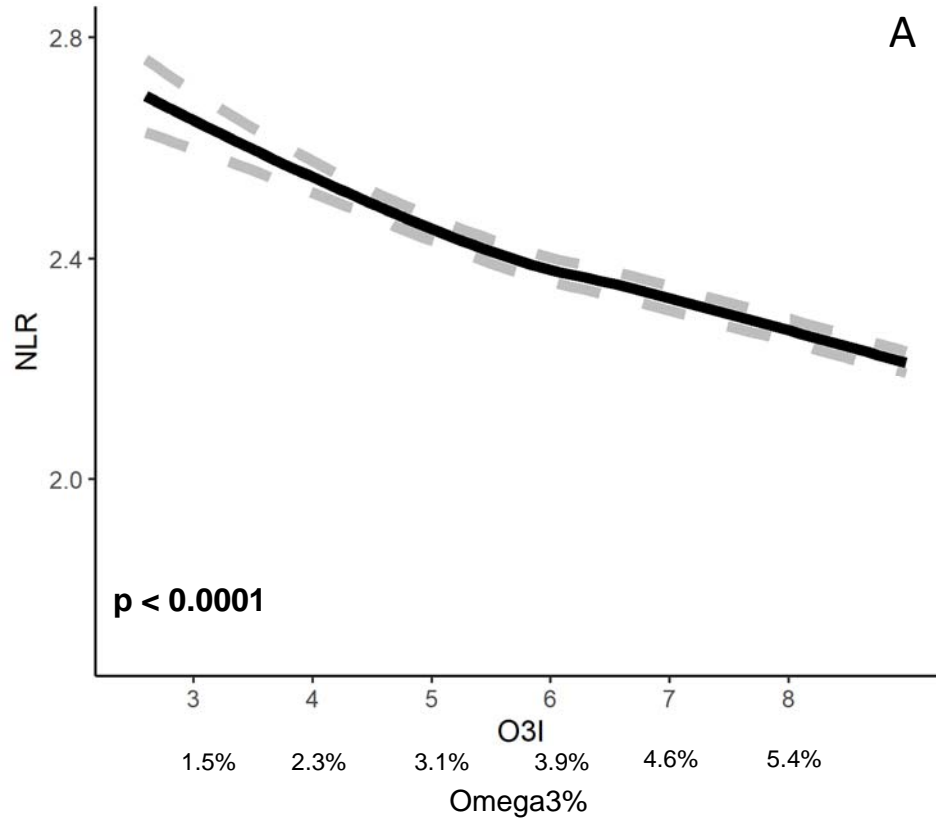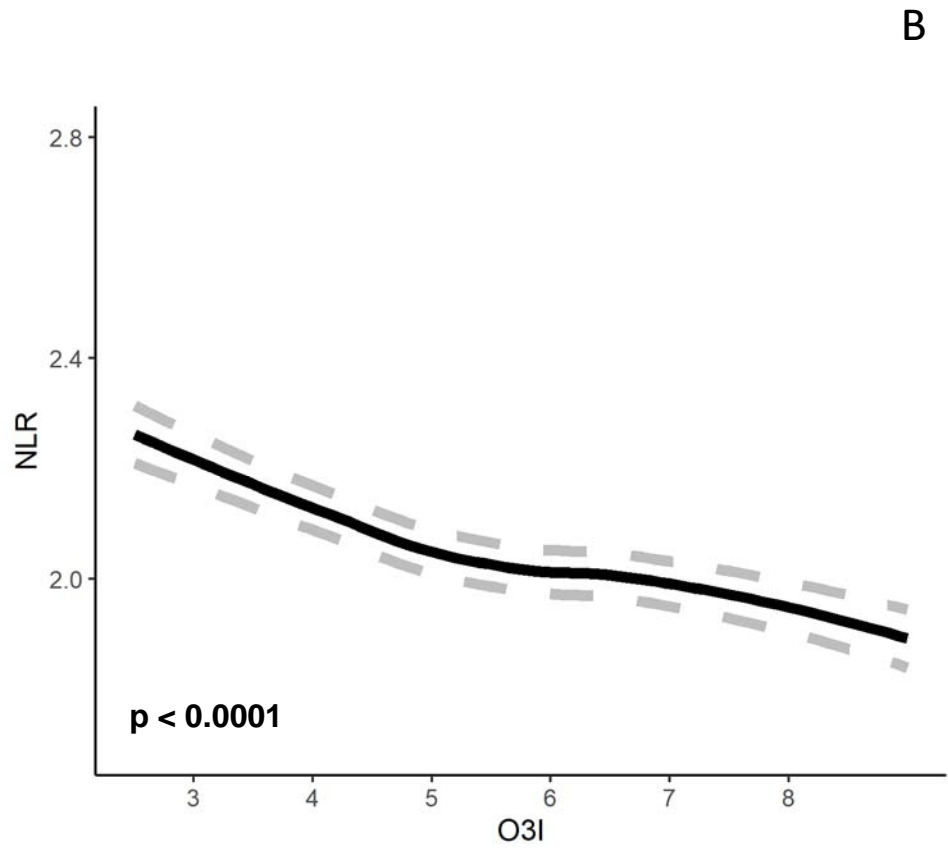

Source: https://medrxiv.org/content/10.1101/2022.12.09.22283290v1.full.pdf
